# Supplementary material for: 4-Nitrophenylacetylene-modified Cu2O cubes and rhombic dodecahedra showing superior photocatalytic activity through surface band structure modulation
Source: Royal Society of Chemistry journal article supplement (doi:10.1039/d2tc00294a), 2022-01-01
Supplement: d2tc00294a1.pdf [file d2tc00294a1.pdf]

Electronic Supplementary Information

**4-Nitrophenylacetylene-modified Cu<sub>2</sub>O cubes and rhombic dodecahedra showing superior photocatalytic activity through surface band structure modulation**

Shang-Ju Chan,<sup>a</sup> Jui-Cheng Kao,<sup>b</sup> Po-Jung Chou,<sup>a</sup> Yu-Chieh Lo,<sup>b</sup> Jyh-Pin Chou,<sup>\*c</sup> and Michael H. Huang<sup>\*a</sup>

<sup>a</sup>*Department of Chemistry and Frontier Research Center on Fundamental and Applied Sciences of Matters, National Tsing Hua University, Hsinchu 30013, Taiwan. E-mail: hyhuang@mx.nthu.edu.tw*

<sup>b</sup>*Department of Materials Science and Engineering, National Yang Ming Chiao Tung University, Hsinchu 30010, Taiwan.*

<sup>c</sup>*Department of Physics, National Changhua University of Education, Changhua 50007, Taiwan. E-mail: jpchou@cc.ncue.edu.tw*

**Chemicals**

Copper(II) chloride anhydrous (CuCl<sub>2</sub>, 98%, Alfa Aesar), hydroxylamine hydrochloride (NH<sub>2</sub>OH·HCl, 99%, Sigma–Aldrich), sodium hydroxide (NaOH, 98%, SHOWA), sodium dodecyl sulfate (C<sub>12</sub>H<sub>25</sub>NaSO<sub>4</sub>, ≥99.0%, J. T. Baker), potassium carbonate (K<sub>2</sub>CO<sub>3</sub>, 99%, Alfa Aesar), absolute ethanol (C<sub>2</sub>H<sub>5</sub>OH, ≥99.5%, Honeywell), acetonitrile (CH<sub>3</sub>CN, 99.5%, Acros Organics), methyl orange (C<sub>14</sub>H<sub>14</sub>N<sub>3</sub>NaO<sub>3</sub>S, Alfa Aesar), 1-ethynyl-4-nitrobenzene (C<sub>8</sub>H<sub>5</sub>NO<sub>2</sub>, 98%, Combi-Blocks), chromic(VI) acid (CrO<sub>3</sub>, 99.5%, Acros Organics), and sodium oxalate (Na<sub>2</sub>C<sub>2</sub>O<sub>4</sub>, ≥99.0%, Sigma–Aldrich) were used as received. A spin-trapping reagent DMPO (5,5-dimethyl-1-pyrroline-N-oxide, 98%, Matrix Scientific) needs to be treated with activated charcoal for further purification. Milli-Q water (18.2 MΩ) was used to prepare all the solutions in the experiments.

**Synthesis of Cu<sub>2</sub>O polyhedra**

For the synthesis of Cu<sub>2</sub>O nanocubes and octahedra, 9.50 mL and 9.00 mL of deionized water were respectively added in the sample vials containing 0.087 g of SDS surfactant. Next, 0.1 mL of 0.1 M CuCl<sub>2</sub> solution was added into the vials that were kept in a 30–32 °C water bath with vigorous stirring, and 0.2 mL of 1.0 M NaOH solution was introduced. The color of solution would immediately change from colorless to light blue due to the formation of Cu(OH)<sub>2</sub>. After stirring for 5 and 3 sec, 0.15 and 0.65 mL of 0.2 M NH<sub>2</sub>OH·HCl reductant respectively were quickly injected and stirred for 10 sec. After stop stirring, and solutions were aged respectively for 50 and 25 min. The reason for shortening the aging time in making Cu<sub>2</sub>O octahedra is because large particles and hexapods can form with a longer reaction time.

To make Cu<sub>2</sub>O rhombic dodecahedra, 6.90 mL of deionized water was added to a vial containing 0.087 g of SDS, followed by the addition of 0.5 mL of 0.1 M CuCl<sub>2</sub> solution. The vial was kept in a 30–32 °C water bath with vigorous stirring. Next, 0.18 mL of 1.0 M NaOH solution was added. The solution color would immediately change from colorless to light blue due to the formation of Cu(OH)<sub>2</sub>. After stirring for 5 sec, 2.40 mL of 0.1 M NH<sub>2</sub>OH·HCl solution was quickly injected and stirred for 10 sec. Finally, the solution was aged for 50 min without stirring.

All products were centrifuged at 7000 rpm for 3 min (Hermle Z323 centrifuge) and washed with 1:1 volume ratio of water and ethanol to remove unreacted chemicals, and finally washed with absolute ethanol. After washing, the particles were dried and stored in a vacuum oven.

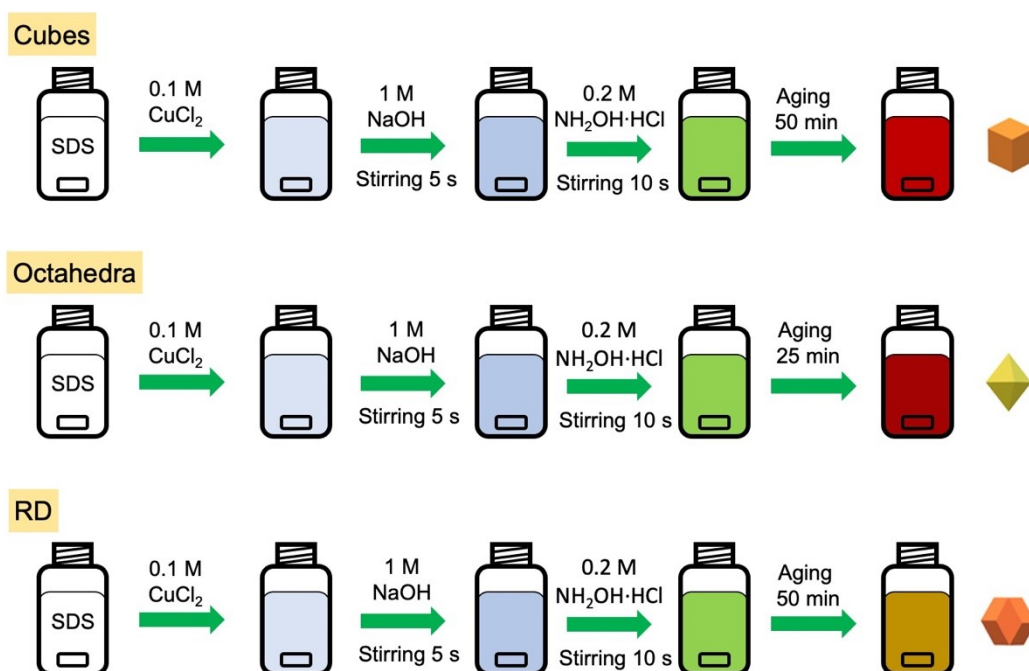

**Fig. S1** Reaction conditions used to synthesize different Cu<sub>2</sub>O crystals. The solution colors reflect the experimental observations.

**Table S1** Reagent amounts used for the synthesis of different Cu<sub>2</sub>O crystals.

|           | SDS<br>(g) | 0.1 M<br>CuCl <sub>2</sub><br>(mL) | 1 M<br>NaOH<br>(mL) | NH <sub>2</sub> OH·HCl<br>(M/mL) | H <sub>2</sub> O<br>(mL) |
|-----------|------------|------------------------------------|---------------------|----------------------------------|--------------------------|
| Cubes     | 0.087      | 0.1                                | 0.20                | 0.2 / 0.15                       | 9.50                     |
| Octahedra | 0.087      | 0.1                                | 0.20                | 0.2 / 0.65                       | 9.00                     |
| RD        | 0.087      | 0.5                                | 0.18                | 0.1 / 2.40                       | 6.90                     |

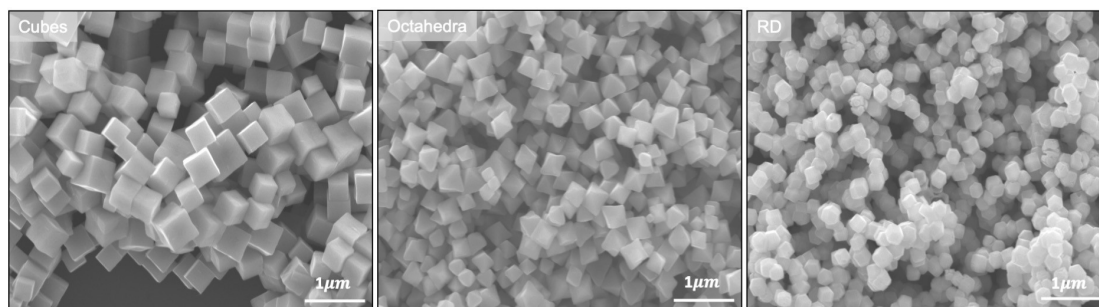

**Fig. S2** SEM images of the prepared Cu<sub>2</sub>O cubes, octahedra, and rhombic dodecahedra. The cubes can show slight depression at their face centers.

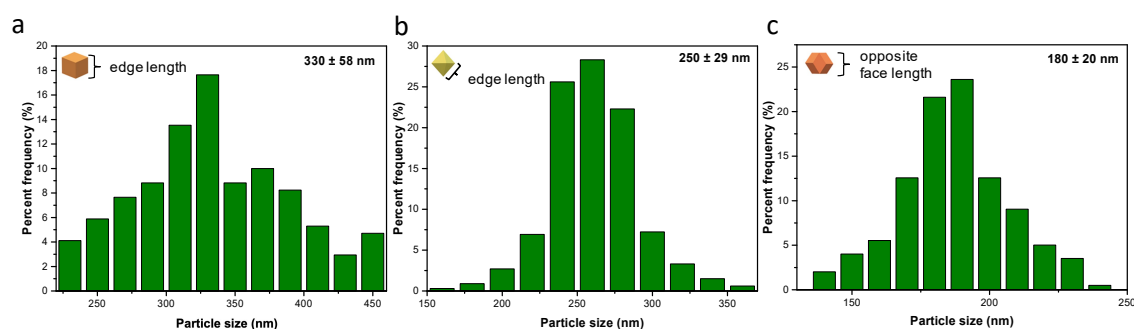

**Fig. S3** Size distribution histograms of the prepared Cu<sub>2</sub>O (a) cubes, (b) octahedra, and (c) rhombic dodecahedra. Over 250 counts were made for each sample.

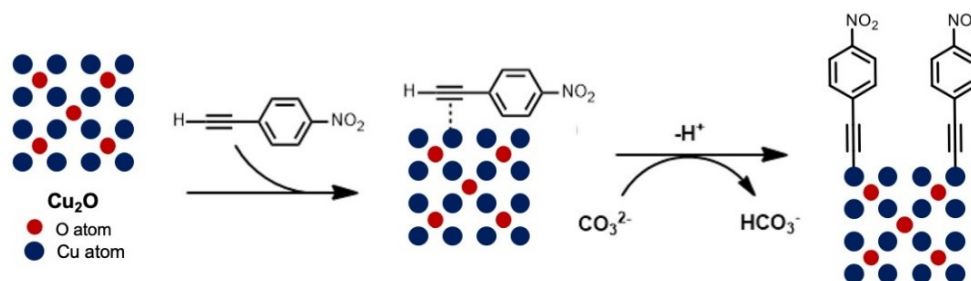

**Fig. S4** Reaction mechanism of 4-NA molecules on Cu<sub>2</sub>O surface.

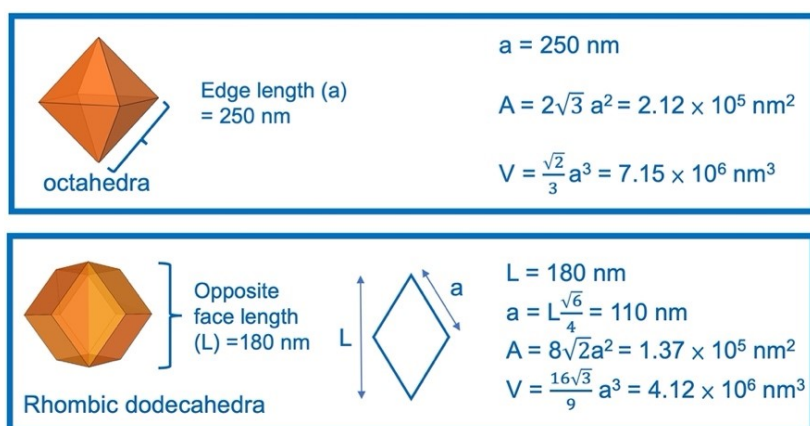

**Fig. S5** Calculations of surface area and volume of a single Cu<sub>2</sub>O cube, octahedron, and rhombic dodecahedron.

**Table S2** Calculations of the amounts of Cu<sub>2</sub>O crystals needed for photocatalysis experiments with a total particle surface area of 0.03 m<sup>2</sup>.

|                                                   | Cubes                  | Octahedra             | RD                    |
|---------------------------------------------------|------------------------|-----------------------|-----------------------|
| size (nm)                                         | 330                    | 350                   | 180                   |
| surface area for one particle (nm <sup>2</sup> )  | $6.53 \times 10^5$     | $2.12 \times 10^5$    | $1.37 \times 10^5$    |
| volume for one particle (nm <sup>3</sup> )        | $3.59 \times 10^7$     | $7.15 \times 10^6$    | $4.12 \times 10^6$    |
| fixed total surface area (m <sup>2</sup> )        | 0.03                   | 0.03                  | 0.03                  |
| number of particles                               | $4.59 \times 10^{10}$  | $1.42 \times 10^{11}$ | $2.18 \times 10^{11}$ |
| total volume (nm <sup>3</sup> )                   | $1.65 \times 10^{18}$  | $1.01 \times 10^{18}$ | $8.98 \times 10^{17}$ |
| density of Cu <sub>2</sub> O (g/nm <sup>3</sup> ) | $6.03 \times 10^{-21}$ |                       |                       |
| weight (mg)                                       | 9.9                    | 6.1                   | 5.4                   |

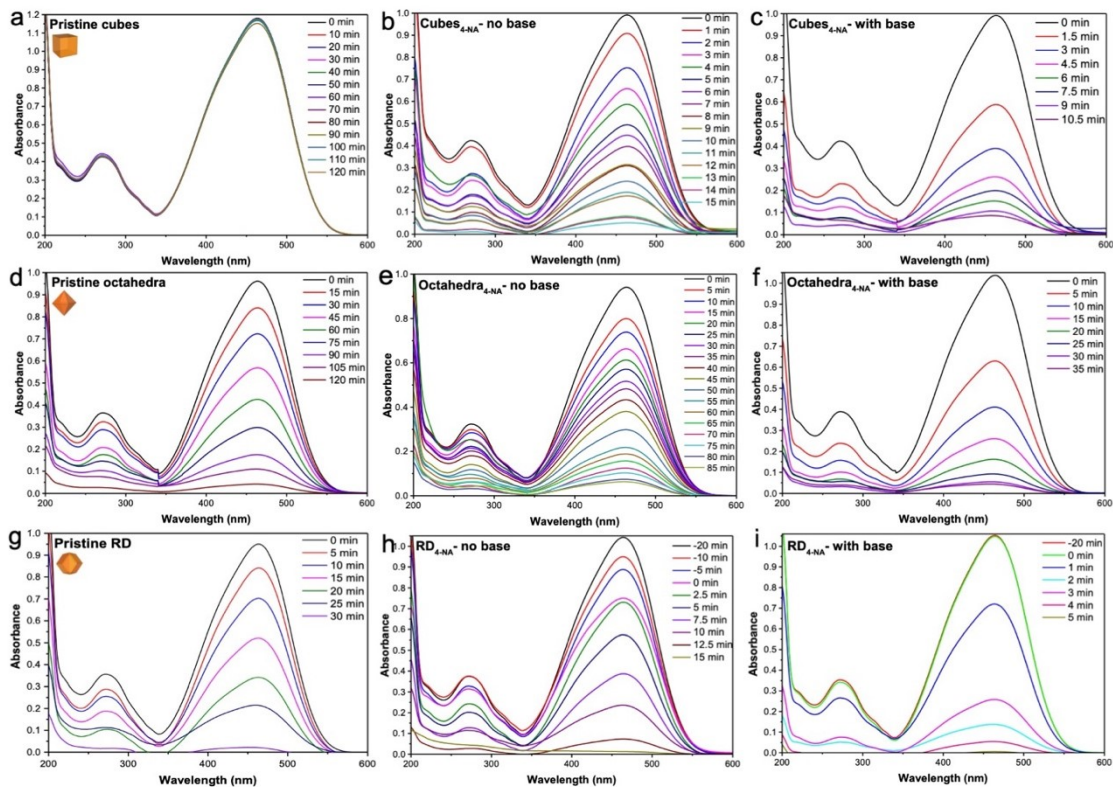

**Fig. S6** UV-vis absorption spectra of methyl orange as a function of irradiation time using (a-c) pristine Cu<sub>2</sub>O cubes and 4-NA-modified cubes with and without adding K<sub>2</sub>CO<sub>3</sub>, (d-f) pristine Cu<sub>2</sub>O octahedra and 4-NA-modified octahedra with and without adding K<sub>2</sub>CO<sub>3</sub>, and (g-i) pristine Cu<sub>2</sub>O rhombic dodecahedra and 4-NA-modified rhombic dodecahedra with and without adding K<sub>2</sub>CO<sub>3</sub>.

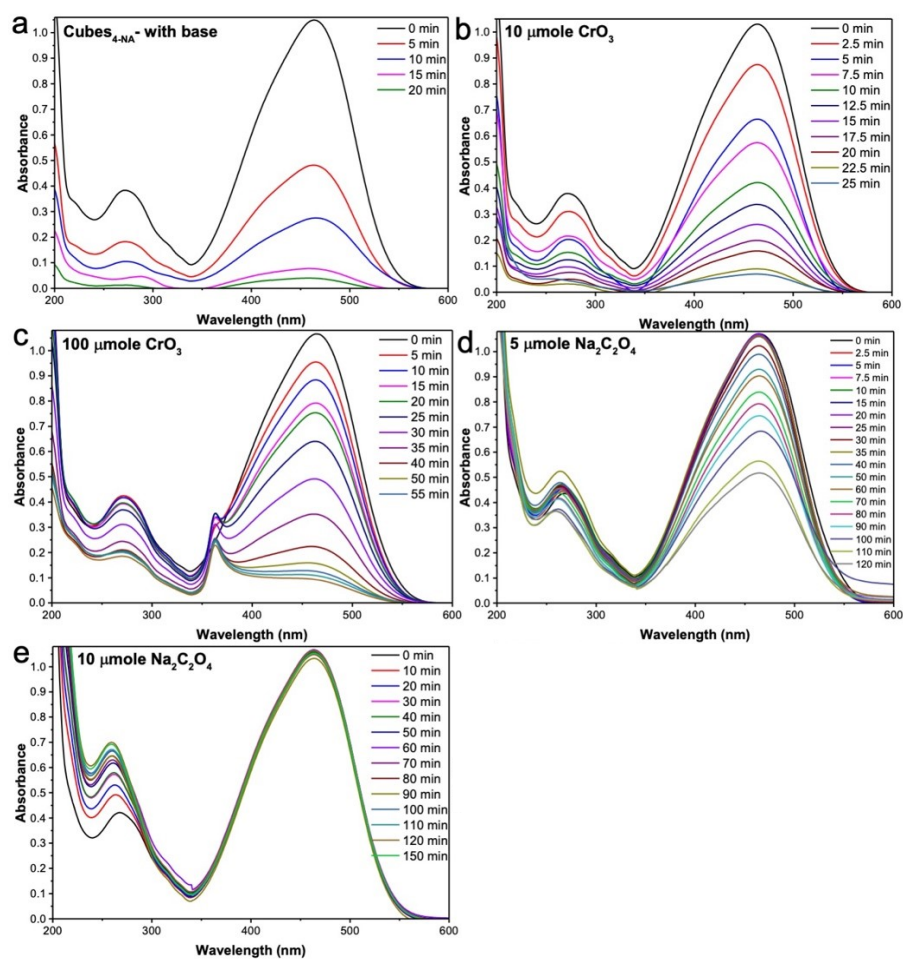

**Fig. S7** Electron ( $\text{CrO}_3$ ) and hole ( $\text{Na}_2\text{C}_2\text{O}_4$ ) scavenger experiments. UV-vis absorption spectra of (a) 4-NA-modified  $\text{Cu}_2\text{O}$  cubes without adding scavengers, (b) adding 10  $\mu\text{mole CrO}_3$ , (c) 100  $\mu\text{mole CrO}_3$  (d) 5  $\mu\text{mole Na}_2\text{C}_2\text{O}_4$ , and (e) 10  $\mu\text{mole Na}_2\text{C}_2\text{O}_4$ .



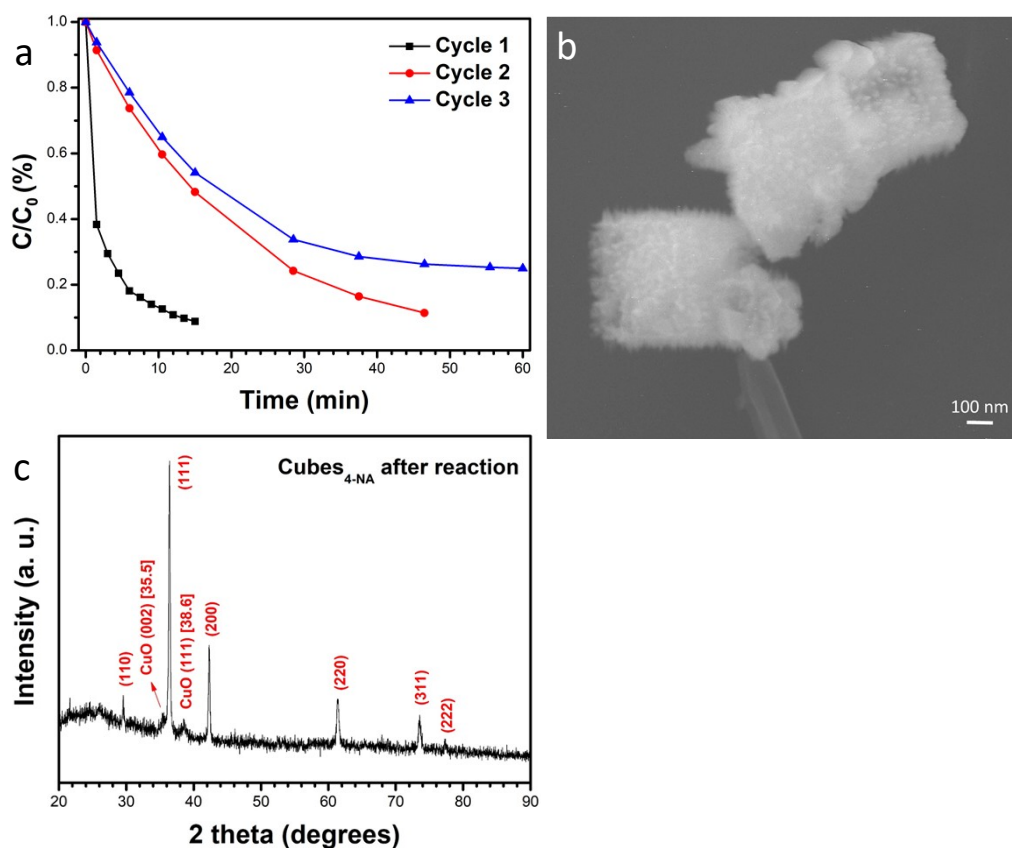

**Fig. S8** (a) Plot of three cycles of MO photodegradation experiment using 4-NA-functionalized  $\text{Cu}_2\text{O}$  cubes as the photocatalyst.  $\text{K}_2\text{CO}_3$  was added. (b) SEM image of  $\text{Cu}_2\text{O}$  cubes after three cycles of photodegradation experiment. (c) XRD patterns of the particles after three cycles of photodegradation experiment.

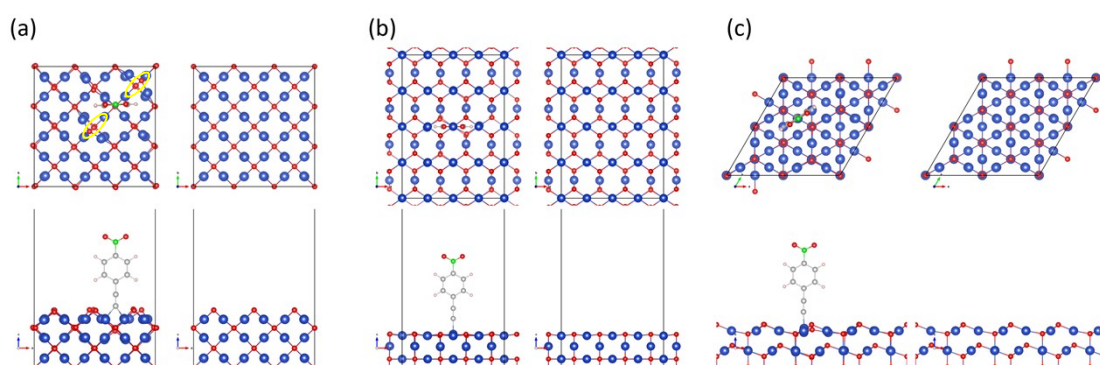

**Fig. S9** Geometric structures of 4-NA before (right panel) and after (left panel) adsorption on  $\text{Cu}_2\text{O}$  (a) {100}, (b) {110}, and (c) {111} surfaces. Top and side views are shown. 4-NA adsorption does not involve significant changes to the  $\text{Cu}_2\text{O}$  surface structure, except for the {100} case with neighboring oxygen atoms moving by  $\sim 1$  Å due to molecular repulsion (see circled regions).

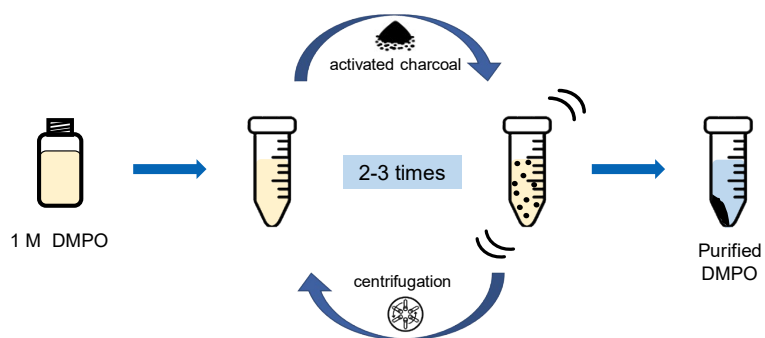

**Fig. S10** Procedure used to purify DMPO.

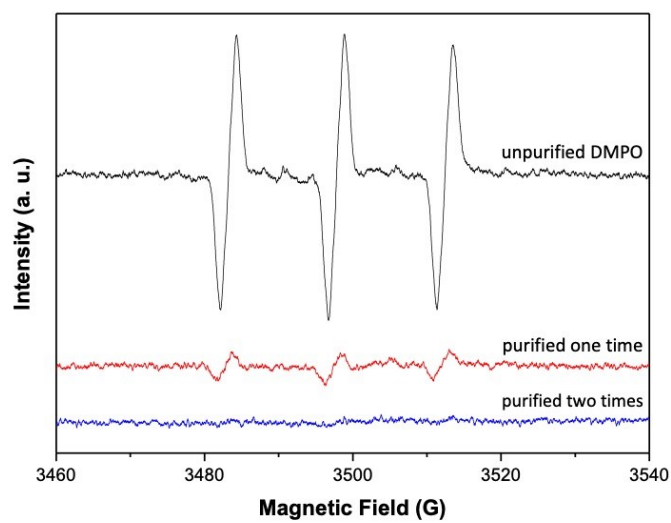

**Fig. S11** EPR spectra before and after DMPO purification.
